# Supplementary material
Source: PubMed Central journal article supplement (PMC3805090)
Supplement: NIHMS492003-supplement-nrg-s2.pdf [file NIHMS492003-supplement-nrg-s2.pdf]

Table 1. Representative Ohnologs mapping to the MHC/neurotrophin- and HOX-paralogons

|                                                      | Genes with immunologic functions                      | Location <sup>a</sup>                   | Function                                                                                                                 | Other members mapping to the paralogons                  | Location <sup>a</sup>                       |
|------------------------------------------------------|-------------------------------------------------------|-----------------------------------------|--------------------------------------------------------------------------------------------------------------------------|----------------------------------------------------------|---------------------------------------------|
| <b>MHC/neurotrophin paralogons</b>                   |                                                       |                                         |                                                                                                                          |                                                          |                                             |
| <b>Genes involved in antigen processing</b>          |                                                       |                                         |                                                                                                                          |                                                          |                                             |
| 20S proteasome β-subunits                            | <i>PSMB8</i>                                          | 6p21.3 (MHC)                            | Production of MHC class I-binding peptides                                                                               | <i>PSMB5</i>                                             | 14q11.2                                     |
|                                                      | <i>PSMB9</i>                                          | 6p21.3 (MHC)                            | Production of MHC class I-binding peptides                                                                               | <i>PSMB7</i>                                             | 9q34.11-q34.12                              |
|                                                      | <i>PSMB11</i>                                         | 14q11.2                                 | Positive selection of CD8+ T cells?                                                                                      |                                                          |                                             |
| TAP                                                  | <i>TAP1</i><br><i>TAP2</i>                            | 6p21.3 (MHC)                            | Transport of peptides into the endoplasmic reticulum                                                                     | <i>ABCB9 (TAPL)</i>                                      | 12q24                                       |
| Tapasin                                              | <i>TAPBP</i>                                          | 6p21.3 (MHC)                            | Promotes association of TAP and MHC class I molecules                                                                    | <i>TAPBPL</i>                                            | 12p13.3                                     |
| Cathepsins                                           | <i>CTSL</i>                                           | 9q21-q22                                | CD4+ T cell and NKT cell development                                                                                     | <i>CTSH</i>                                              | 15q24-q25                                   |
|                                                      | <i>CTSL2</i>                                          | 9q22.2                                  | CD4+ T cell and NKT cell development                                                                                     | <i>CTSK</i>                                              | 1q21                                        |
|                                                      | <i>CTSS</i>                                           | 1q21                                    | Removal of invariant chains in B cells and dendritic cells                                                               | <i>CTSG</i>                                              | 14q11.2                                     |
|                                                      | <i>CTSD</i>                                           | 11p15.5                                 | Production of MHC class II-binding peptides                                                                              | <i>CTSC</i><br><i>CTSF</i><br><i>CTSW</i>                | 11q14.1-q14.3<br>11q13.1<br>11q13.1         |
| <b>Genes involved in expression of MHC molecules</b> |                                                       |                                         |                                                                                                                          |                                                          |                                             |
| Retinoid X receptor                                  | <i>RXRβ</i>                                           | 6p21.3 (MHC)                            | MHC class I expression                                                                                                   | <i>RXRA</i><br><i>RXRG</i>                               | 9q34.3<br>1q22-q23                          |
| Regulatory factor X                                  | <i>RFX5</i>                                           | 1q21                                    | MHC class II expression                                                                                                  | <i>RFX1</i><br><i>RFX2</i><br><i>RFX3</i><br><i>RFX4</i> | 19p13.1<br>19p13.3-p13.2<br>9p24.2<br>12q24 |
| <b>Complement genes</b>                              |                                                       |                                         |                                                                                                                          |                                                          |                                             |
| Complement components                                | <i>C3</i><br><i>C4A, C4B</i><br><i>C5</i>             | 19p13.3-p13.2<br>6p21.3 (MHC)<br>9q34.1 | A central component of complement activation<br>Component of the classical pathway<br>Component of the classical pathway | <i>A2M</i>                                               | 12p13.3-p12.3                               |
| <b>Cytokine and granzyme genes</b>                   |                                                       |                                         |                                                                                                                          |                                                          |                                             |
| Tumor necrosis factor (TNF) superfamily ligands      | <i>LTA (TNFSF1)</i>                                   | 6p21.3 (MHC)                            | Lymphotoxin α: inflammation, lymphoid organ development                                                                  | <i>TNFSF15</i>                                           | 9q32                                        |
|                                                      | <i>TNF (TNFSF2)</i>                                   | 6p21.3 (MHC)                            | Tumor necrosis factor α: cytokine produced by monocytes                                                                  |                                                          |                                             |
|                                                      | <i>LTB (TNFSF3)</i>                                   | 6p21.3 (MHC)                            | Lymphotoxin β: inflammation, lymphoid organ development                                                                  |                                                          |                                             |
|                                                      | <i>TNFSF4</i>                                         | 1q25                                    | OX40 ligand: activation of B cells and macrophages                                                                       |                                                          |                                             |
|                                                      | <i>TNFSF6</i>                                         | 1q23                                    | Fas ligand: apoptosis of Fas-expressing cells                                                                            |                                                          |                                             |
|                                                      | <i>TNFSF8</i>                                         | 9q33                                    | CD30 ligand: B cell proliferation                                                                                        |                                                          |                                             |
|                                                      | <i>TNFSF9</i>                                         | 19p13.3                                 | 4-1BB-L: activation-induced cell death and T cell proliferation                                                          |                                                          |                                             |
|                                                      | <i>TNFSF14</i>                                        | 19p13.3                                 | LIGHT: T cell proliferation                                                                                              |                                                          |                                             |
|                                                      | <i>TNFSF18</i>                                        | 1q23                                    | GITRL: modulation of T cell survival                                                                                     |                                                          |                                             |
| Granzyme                                             | <i>GZMB, GZMH</i><br><i>GZMM</i><br><i>GZMA, GZMK</i> | 14q11.2<br>19p13.3<br>5q11-q12          | Serine proteases of NK and T cells involved in target cell killing                                                       |                                                          |                                             |

## SUPPLEMENTARY INFORMATION

### Genes involved in signal reception or transduction

|                                                         |                   |               |                                                                                   |               |               |
|---------------------------------------------------------|-------------------|---------------|-----------------------------------------------------------------------------------|---------------|---------------|
| Janus kinases                                           | <i>JAK1</i>       | 1p31.3        | Cytokine signaling (IL-2, IL-4, IL-6, IFN- $\alpha/\beta$ , IFN- $\gamma$ , etc.) |               |               |
|                                                         | <i>JAK2</i>       | 9p24          | Cytokine signaling (IL-3, IFN- $\gamma$ , etc.)                                   |               |               |
|                                                         | <i>JAK3</i>       | 19p13.1       | Cytokine signaling (IL-2, IL-4, IL-7, etc.)                                       |               |               |
|                                                         | <i>TYK2</i>       | 19p13.2       | Cytokine signaling (IL-10, IL-12, IFN- $\alpha/\beta$ , IFN- $\gamma$ , etc.)     |               |               |
| PIAS (Protein inhibitor of activated STAT) <sup>b</sup> | <i>PIAS1</i>      | 15q22         | Inhibitor of activated STAT1                                                      |               |               |
|                                                         | <i>PIAS3</i>      | 1q21          | Inhibitor of activated STAT3                                                      |               |               |
|                                                         | <i>PIAS4</i>      | 19p13.3       | Inhibitor of activated STAT4                                                      |               |               |
| VAV                                                     | <i>VAV1</i>       | 19p13.3-p13.2 | T and B cell development and activation                                           | <i>VAV2</i>   | 9q34          |
|                                                         |                   |               |                                                                                   | <i>VAV3</i>   | 1p13.3        |
| NOTCH                                                   | <i>NOTCH1</i>     | 9q34.3        | T cell development                                                                | <i>NOTCH2</i> | 1p13-p11      |
|                                                         |                   |               |                                                                                   | <i>NOTCH3</i> | 19p13.2-p13.1 |
|                                                         |                   |               |                                                                                   | <i>NOTCH4</i> | 6p21.3 (MHC)  |
| CSK                                                     | <i>CSK</i>        | 15q23-q25     | Signal transduction through the T cell receptor                                   |               |               |
|                                                         | <i>CHK (MATK)</i> | 19p13.3       | Signal transduction in immune cells                                               |               |               |

### HOX paralogs

#### Genes coding for transcription factors

|                            |               |              |                                                           |            |         |
|----------------------------|---------------|--------------|-----------------------------------------------------------|------------|---------|
| STAT transcription factors | <i>STAT1</i>  | 2q32.2       | Cytokine signaling (IFN- $\alpha/\beta$ , IFN- $\gamma$ ) |            |         |
|                            | <i>STAT2</i>  | 12q13.2      | Cytokine signaling (IFN- $\alpha/\beta$ )                 |            |         |
|                            | <i>STAT3</i>  | 17q21.31     | Cytokine signaling (IL-6, IL-10)                          |            |         |
|                            | <i>STAT4</i>  | 2q32.2-q32.3 | Cytokine signaling (IL-12)                                |            |         |
|                            | <i>STAT5A</i> | 17q11.2      | Cytokine signaling (IL-2, IL-7, IL-9)                     |            |         |
|                            | <i>STAT5B</i> | 17q11.2      | Cytokine signaling (IL-2, IL-7, IL-9)                     |            |         |
|                            | <i>STAT6</i>  | 12q13        | Cytokine signaling (IL-4)                                 |            |         |
| SP transcription factors   | <i>SP2</i>    | 17q21.32     | T cell transcriptional regulatory element                 | <i>SP1</i> | 12q13.1 |
|                            |               |              |                                                           | <i>SP3</i> | 2q31    |
|                            |               |              |                                                           | <i>SP4</i> | 7p15    |

#### Cytokine genes

|                         |                                                           |              |                                                                                                                             |  |  |
|-------------------------|-----------------------------------------------------------|--------------|-----------------------------------------------------------------------------------------------------------------------------|--|--|
| Chemokines              |                                                           |              |                                                                                                                             |  |  |
| CC chemokines           | <i>CCL1, 2, 3, 4, 5, 7, 8, 11, 13, 14, 15, 16, 18, 23</i> | 17q11-q12    | Recruitment of leukocytes to sites of infection                                                                             |  |  |
|                         | <i>CCL20</i>                                              | 2q33-q37     | Regulation of the traffic of leukocytes including T cells, B cells and dendritic cells<br>Development of nonlymphoid organs |  |  |
| Chemokine receptors     |                                                           |              |                                                                                                                             |  |  |
| CC chemokine receptors  | <i>CCR1, 2, 3, 5, 8, 9</i>                                | 3p21-p22     | Recruitment of leukocytes to sites of infection                                                                             |  |  |
|                         | <i>CCRL2</i>                                              |              | Regulation of the traffic of leukocytes including T cells, B cells and dendritic cells                                      |  |  |
|                         | <i>CCR4</i>                                               | 3p24         | Development of nonlymphoid organs                                                                                           |  |  |
|                         | <i>CCR7, 10</i>                                           | 17q12-q21.2  |                                                                                                                             |  |  |
| CXC chemokine receptors |                                                           |              |                                                                                                                             |  |  |
|                         | <i>IL8RA, IL8RB</i>                                       | 2q35         |                                                                                                                             |  |  |
|                         | <i>CXCR4</i>                                              | 2q21         |                                                                                                                             |  |  |
|                         | <i>CXCR6</i>                                              | 3p21         |                                                                                                                             |  |  |
|                         | <i>CXCR7</i>                                              | 2q37.3       |                                                                                                                             |  |  |
| Others                  |                                                           |              |                                                                                                                             |  |  |
|                         | <i>CX3CR1, XCR1</i>                                       | 3p21.3-p21.1 |                                                                                                                             |  |  |

<sup>a</sup> Chromosomal localization of human genes based on the OMIM database (<http://www.ncbi.nlm.nih.gov/omim>) or Entrez gene (<http://www.ncbi.nlm.nih.gov/sites/entrez?db=gene>).

<sup>b</sup> PIAS2, an inhibitor of activated STAT2, maps to 18q12.1-q12.3.
